# Supplementary material
Source: PubMed Central journal article supplement (PMC151285)

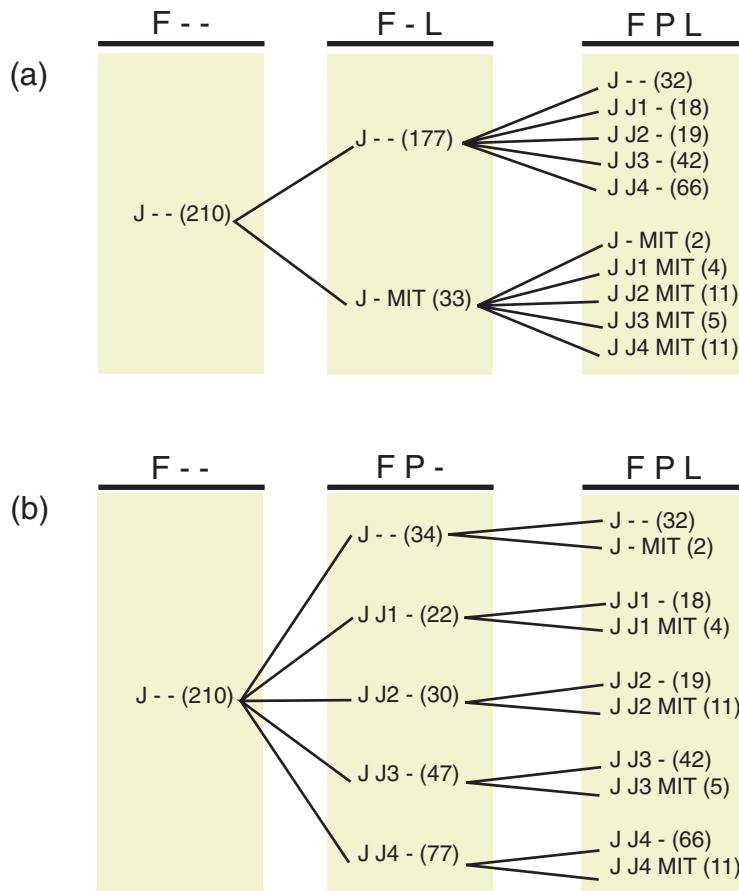

Supplementary figure 1

Supplement: gb-2002-4-1-r4-s1.pdf [file gb-2002-4-1-r4-s1.pdf]
